# Supplementary material
Source: PubMed Central journal article supplement (PMC6791568)
Supplement: ehp-127-057010-s001.pdf [file ehp-127-057010-s001.pdf]

**Note to readers with disabilities:** *EHP* strives to ensure that all journal content is accessible to all readers. However, some figures and Supplemental Material published in *EHP* articles may not conform to [508 standards](#) due to the complexity of the information being presented. If you need assistance accessing journal content, please contact [ehp508@niehs.nih.gov](mailto:ehp508@niehs.nih.gov). Our staff will work with you to assess and meet your accessibility needs within 3 working days.

### **Supplemental Material**

#### **Metabolomics Profiling before, during, and after the Beijing Olympics: A Panel Study of Within-Individual Differences during Periods of High and Low Air Pollution**

Lina Mu, Zhongzheng Niu, Rachael Hageman Blair, Han Yu, Richard W. Browne, Matthew R. Bonner, Tiffany Fanter, Furong Deng, and Mya Swanson

#### **Table of Contents**

**Table S1.** Subclasses of 74 out of 886 metabolites that were different before, during, and after 2008 Beijing Olympics in 26 non-smoking adults.

**Table S2.** ANOVA test of modules for times before, during, and after the Olympics, sex, and interaction in 26 non-smoking adults.

**Table S3.** Metabolites and associated classes detected from module 1-4 with significant differences (adjusted  $P < 0.05$ ) before, during and after the Beijing 2008 Olympics in 26 non-smoking adults.

**Supplemental Table S1. Subclasses of 74 out of 886 metabolites that were different before, during, and after 2008 Beijing Olympics in 26 non-smoking adults \***

| <b>Super class</b>                        | <b>Class</b>                                                | <b># of metabolites in subclass</b> | <b># of metabolites changed with P&lt;0.05 *</b> |
|-------------------------------------------|-------------------------------------------------------------|-------------------------------------|--------------------------------------------------|
| <b>Amino Acid Super Class</b>             |                                                             |                                     |                                                  |
|                                           | <i>Alanine and Aspartate Metabolism</i>                     | 5                                   | 0                                                |
|                                           | <i>Creatine Metabolism</i>                                  | 2                                   | 0                                                |
|                                           | <i>Glutamate Metabolism</i>                                 | 5                                   | 1                                                |
|                                           | <i>Glutathione Metabolism</i>                               | 3                                   | 0                                                |
|                                           | <i>Glycine, Serine and Threonine Metabolism</i>             | 10                                  | 0                                                |
|                                           | <i>Guanidino and Acetamido Metabolism</i>                   | 1                                   | 0                                                |
|                                           | <i>Histidine Metabolism</i>                                 | 7                                   | 0                                                |
|                                           | <i>Leucine, Isoleucine and Valine Metabolism</i>            | 21                                  | 0                                                |
|                                           | <i>Lysine Metabolism</i>                                    | 5                                   | 0                                                |
|                                           | <i>Methionine, Cysteine, SAM and Taurine Metabolism</i>     | 11                                  | 0                                                |
|                                           | <i>Phenylalanine and Tyrosine Metabolism</i>                | 19                                  | 1                                                |
|                                           | <i>Polyamine Metabolism</i>                                 | 4                                   | 0                                                |
|                                           | <i>Tryptophan Metabolism</i>                                | 14                                  | 0                                                |
|                                           | <i>Urea cycle; Arginine and Proline Metabolism</i>          | 13                                  | 0                                                |
| <b>Carbohydrate Super Class</b>           |                                                             |                                     |                                                  |
|                                           | <i>Aminosugar Metabolism</i>                                | 2                                   | 0                                                |
|                                           | <i>Fructose, Mannose and Galactose Metabolism</i>           | 4                                   | 1                                                |
|                                           | <i>Glycolysis, Gluconeogenesis, and Pyruvate Metabolism</i> | 5                                   | 1                                                |
|                                           | <i>Pentose Metabolism</i>                                   | 11                                  | 1                                                |
| <b>Cofactors and Vitamins Super Class</b> |                                                             |                                     |                                                  |
|                                           | <i>Ascorbate and Aldarate Metabolism</i>                    | 4                                   | 2                                                |
|                                           | <i>Hemoglobin and Porphyrin Metabolism</i>                  | 5                                   | 0                                                |
|                                           | <i>Nicotinate and Nicotinamide Metabolism</i>               | 4                                   | 1                                                |
|                                           | <i>Pantothenate and CoA Metabolism</i>                      | 1                                   | 0                                                |
|                                           | <i>Riboflavin Metabolism</i>                                | 1                                   | 0                                                |
|                                           | <i>Tocopherol Metabolism</i>                                | 6                                   | 0                                                |
|                                           | <i>Vitamin B6 Metabolism</i>                                | 1                                   | 0                                                |
| <b>Energy Super Class</b>                 |                                                             |                                     |                                                  |
|                                           | <i>Oxidative Phosphorylation</i>                            | 2                                   | 0                                                |
|                                           | <i>TCA Cycle</i>                                            | 6                                   | 0                                                |
| <b>Lipid Super Class</b>                  |                                                             |                                     |                                                  |
|                                           | <i>Carnitine Metabolism</i>                                 | 3                                   | 0                                                |
|                                           | <i>Diacylglycerol</i>                                       | 2                                   | 0                                                |
|                                           | <i>Eicosanoid</i>                                           | 2                                   | 0                                                |
|                                           | <i>Endocannabinoid</i>                                      | 5                                   | 1                                                |
|                                           | <i>Fatty Acid Metabolism (also BCAA Metabolism)</i>         | 2                                   | 0                                                |
|                                           | <i>Fatty Acid Metabolism(Acyl Carnitine)</i>                | 12                                  | 1                                                |
|                                           | <i>Fatty Acid Synthesis</i>                                 | 1                                   | 0                                                |
|                                           | <i>Fatty Acid, Amide</i>                                    | 2                                   | 0                                                |
|                                           | <i>Fatty Acid, Amino</i>                                    | 2                                   | 0                                                |
|                                           | <i>Fatty Acid, Branched</i>                                 | 1                                   | 0                                                |
|                                           | <i>Fatty Acid, Dicarboxylate</i>                            | 7                                   | 2                                                |
|                                           | <i>Fatty Acid, Methyl Ester</i>                             | 1                                   | 0                                                |
|                                           | <i>Fatty Acid, Monohydroxy</i>                              | 6                                   | 2                                                |
|                                           | <i>Glycerolipid Metabolism</i>                              | 2                                   | 1                                                |
|                                           | <i>Inositol Metabolism</i>                                  | 3                                   | 0                                                |
|                                           | <i>Ketone Bodies</i>                                        | 2                                   | 0                                                |
|                                           | <i>Long Chain Fatty Acid</i>                                | 17                                  | 8                                                |
|                                           | <i>Lysolipid</i>                                            | 63                                  | 1                                                |
|                                           | <i>Medium Chain Fatty Acid</i>                              | 8                                   | 4                                                |
|                                           | <i>Monoacylglycerol</i>                                     | 10                                  | 0                                                |
|                                           | <i>Phospholipid Metabolism</i>                              | 4                                   | 0                                                |
|                                           | <i>Polyunsaturated Fatty Acid (n3 and n6)</i>               | 14                                  | 5                                                |
|                                           | <i>Primary Bile Acid Metabolism</i>                         | 5                                   | 0                                                |
|                                           | <i>Secondary Bile Acid Metabolism</i>                       | 10                                  | 0                                                |
|                                           | <i>Short Chain Fatty Acid</i>                               | 1                                   | 0                                                |

|                                                             |     |    |
|-------------------------------------------------------------|-----|----|
| <i>Sphingolipid Metabolism</i>                              | 5   | 0  |
| <i>Steroid</i>                                              | 21  | 4  |
| <i>Sterol</i>                                               | 6   | 1  |
| <b>Nucleotide Super Class</b>                               |     |    |
| <i>Purine and Pyrimidine Metabolism</i>                     | 1   | 0  |
| <i>Purine Metabolism, (Hypo)Xanthine/Inosine containing</i> | 6   | 0  |
| <i>Purine Metabolism, Adenine containing</i>                | 6   | 0  |
| <i>Purine Metabolism, Guanine containing</i>                | 4   | 0  |
| <i>Pyrimidine Metabolism, Cytidine containing</i>           | 2   | 0  |
| <i>Pyrimidine Metabolism, Thymine containing</i>            | 2   | 0  |
| <i>Pyrimidine Metabolism, Uracil containing</i>             | 8   | 0  |
| <b>Peptide Super Class</b>                                  |     |    |
| <i>Dipeptide</i>                                            | 61  | 2  |
| <i>Dipeptide Derivative</i>                                 | 1   | 0  |
| <i>Fibrinogen Cleavage Peptide</i>                          | 2   | 0  |
| <i>Gamma-glutamyl Amino Acid</i>                            | 12  | 1  |
| <i>Polypeptide</i>                                          | 3   | 0  |
| <b>Xenobiotics Super Class</b>                              |     |    |
| <i>Benzoate Metabolism</i>                                  | 12  | 0  |
| <i>Chemical</i>                                             | 10  | 1  |
| <i>Drug</i>                                                 | 18  | 0  |
| <i>Food Component/Plant</i>                                 | 19  | 1  |
| <i>Tobacco Metabolite</i>                                   | 2   | 0  |
| <i>Xanthine Metabolism</i>                                  | 12  | 0  |
| <b>Unidentified</b>                                         | 316 | 23 |

**Notes:**

Statistical comparisons were all adjusted for time-invariant variables including age, sex, BMI, and time-varying variables including diet and transportation mode.

\*: Number of metabolites changed significantly ( $p < 0.05$  prior to adjustment for multiple comparisons) for three-time points comparison or any two-time points contrast.

**Supplemental Table S2. ANOVA test of modules for times before, during, and after the Olympics, sex, and interaction in 26 non-smoking adults.**

| Module | Size | P value            |                             |                                |                               |                    |                                          |
|--------|------|--------------------|-----------------------------|--------------------------------|-------------------------------|--------------------|------------------------------------------|
|        |      | Overall comparison | Adjusted overall comparison | During vs. Before the Olympics | After vs. During the Olympics | Main effect of sex | Interaction between sex and study visits |
| 1      | 38   | 0.0000             | 0.0000                      | 0.0001                         | 0.0000                        | 0.0000             | 0.0629                                   |
| 2      | 37   | 0.0000             | 0.0000                      | 0.0000                         | 0.0000                        | 0.0000             | 0.0001                                   |
| 3      | 23   | 0.0000             | 0.0000                      | 0.0000                         | 0.0118                        | 0.0000             | 0.0018                                   |
| 4      | 5    | 0.0000             | 0.0001                      | 0.0000                         | 0.0004                        | 0.0000             | 0.9787                                   |

**Notes:**

Four modules that were significantly different between both pairs of time points (before vs. during, and during vs. after the Olympics) after multiple comparison adjustment. Size is the number of metabolites (of both known and unknown identity) in each module.

Statistical comparisons were all adjusted for time-invariant variables including age, sex, BMI, and time-varying variables including diet and transportation mode.

**Supplemental Table S3. Metabolites and associated classes detected from module 1 -4 with significant differences (adjusted P < 0.05) before, during and after the Beijing 2008 Olympics in 26 non-smoking adults.**

| <b>Super class</b> | <b>Class</b>                           | <b>Metabolite</b>                                        | <b>Module</b> |
|--------------------|----------------------------------------|----------------------------------------------------------|---------------|
| NA                 | NA                                     | X - 11540                                                | 1             |
| NA                 | NA                                     | X - 12450                                                | 1             |
| NA                 | NA                                     | X - 13435                                                | 1             |
| NA                 | NA                                     | X - 13891                                                | 1             |
| NA                 | NA                                     | X - 18938                                                | 1             |
| Lipid              | Fatty Acid Metabolism(Acyl Carnitine)  | cis-4-decenoyl carnitine                                 | 1             |
| Lipid              | Fatty Acid Metabolism(Acyl Carnitine)  | decanoylcarnitine                                        | 1             |
| Lipid              | Fatty Acid Metabolism(Acyl Carnitine)  | hexanoylcarnitine                                        | 1             |
| Lipid              | Fatty Acid Metabolism(Acyl Carnitine)  | octanoylcarnitine                                        | 1             |
| Lipid              | Fatty Acid, Branched                   | 17-methylstearate                                        | 1             |
| Lipid              | Fatty Acid, Monohydroxy                | 3-hydroxydecanoate                                       | 1             |
| Lipid              | Glycerolipid Metabolism                | glycerol                                                 | 1             |
| Lipid              | Long Chain Fatty Acid                  | 10-heptadecenoate (17:1n7)                               | 1             |
| Lipid              | Long Chain Fatty Acid                  | 10-nonadecenoate (19:1n9)                                | 1             |
| Lipid              | Long Chain Fatty Acid                  | cis-vaccenate (18:1n7)                                   | 1             |
| Lipid              | Long Chain Fatty Acid                  | eicosenoate (20:1n9 or 11)                               | 1             |
| Lipid              | Long Chain Fatty Acid                  | margarate (17:0)                                         | 1             |
| Lipid              | Long Chain Fatty Acid                  | myristate (14:0)                                         | 1             |
| Lipid              | Long Chain Fatty Acid                  | myristoleate (14:1n5)                                    | 1             |
| Lipid              | Long Chain Fatty Acid                  | nonadecanoate (19:0)                                     | 1             |
| Lipid              | Long Chain Fatty Acid                  | oleate (18:1n9)                                          | 1             |
| Lipid              | Long Chain Fatty Acid                  | palmitate (16:0)                                         | 1             |
| Lipid              | Long Chain Fatty Acid                  | palmitoleate (16:1n7)                                    | 1             |
| Lipid              | Long Chain Fatty Acid                  | stearate (18:0)                                          | 1             |
| Lipid              | Lysolipid                              | 1-<br>eicosapentaenoylglycerophosphocholine<br>(20:5n3)* | 1             |
| Lipid              | Medium Chain Fatty Acid                | 5-dodecenoate (12:1n7)                                   | 1             |
| Lipid              | Medium Chain Fatty Acid                | caprate (10:0)                                           | 1             |
| Lipid              | Medium Chain Fatty Acid                | caprylate (8:0)                                          | 1             |
| Lipid              | Medium Chain Fatty Acid                | laurate (12:0)                                           | 1             |
| Lipid              | Polyunsaturated Fatty Acid (n3 and n6) | dihomo-linoleate (20:2n6)                                | 1             |
| Lipid              | Polyunsaturated Fatty Acid (n3 and n6) | dihomo-linolenate (20:3n3 or n6)                         | 1             |
| Lipid              | Polyunsaturated Fatty Acid (n3 and n6) | docosadienoate (22:2n6)                                  | 1             |
| Lipid              | Polyunsaturated Fatty Acid (n3 and n6) | docosapentaenoate (n3 DPA; 22:5n3)                       | 1             |
| Lipid              | Polyunsaturated Fatty Acid (n3 and n6) | docosatrienoate (22:3n3)                                 | 1             |
| Lipid              | Polyunsaturated Fatty Acid (n3 and n6) | eicosapentaenoate (EPA; 20:5n3)                          | 1             |
| Lipid              | Polyunsaturated Fatty Acid (n3 and n6) | linoleate (18:2n6)                                       | 1             |
| Lipid              | Polyunsaturated Fatty Acid (n3 and n6) | linolenate [alpha or gamma; (18:3n3 or<br>6)]            | 1             |
| Lipid              | Polyunsaturated Fatty Acid (n3 and n6) | stearidonate (18:4n3)                                    | 1             |
| NA                 | NA                                     | X - 10445                                                | 2             |
| NA                 | NA                                     | X - 11449                                                | 2             |
| NA                 | NA                                     | X - 15168                                                | 2             |
| NA                 | NA                                     | X - 16036                                                | 2             |
| NA                 | NA                                     | X - 17115                                                | 2             |
| Peptide            | Dipeptide                              | asparagylleucine                                         | 2             |
| Peptide            | Dipeptide                              | aspartylleucine                                          | 2             |
| Peptide            | Dipeptide                              | histidylleucine                                          | 2             |
| Peptide            | Dipeptide                              | histidylvaline                                           | 2             |
| Peptide            | Dipeptide                              | isoleucylalanine                                         | 2             |
| Peptide            | Dipeptide                              | isoleucylaspartate                                       | 2             |
| Peptide            | Dipeptide                              | isoleucylglycine                                         | 2             |
| Peptide            | Dipeptide                              | isoleucylvaline                                          | 2             |
| Peptide            | Dipeptide                              | leucylglutamate                                          | 2             |
| Peptide            | Dipeptide                              | leucylglycine                                            | 2             |
| Peptide            | Dipeptide                              | leucylphenylalanine                                      | 2             |

|                     |                                                             |                              |   |
|---------------------|-------------------------------------------------------------|------------------------------|---|
| <b>Peptide</b>      | <i>Dipeptide</i>                                            | phenylalanylalanine          | 2 |
| <b>Peptide</b>      | <i>Dipeptide</i>                                            | phenylalanylaspargate        | 2 |
| <b>Peptide</b>      | <i>Dipeptide</i>                                            | phenylalanylglycine          | 2 |
| <b>Peptide</b>      | <i>Dipeptide</i>                                            | prolylalanine                | 2 |
| <b>Peptide</b>      | <i>Dipeptide</i>                                            | prolylglycine                | 2 |
| <b>Peptide</b>      | <i>Dipeptide</i>                                            | prolylphenylalanine          | 2 |
| <b>Peptide</b>      | <i>Dipeptide</i>                                            | threonylleucine              | 2 |
| <b>Peptide</b>      | <i>Dipeptide</i>                                            | tyrosylglutamate             | 2 |
| <b>Peptide</b>      | <i>Dipeptide</i>                                            | valylaspargate               | 2 |
| <b>Peptide</b>      | <i>Dipeptide</i>                                            | valylglutamate               | 2 |
| <b>Peptide</b>      | <i>Dipeptide</i>                                            | valylglutamine               | 2 |
| <b>Peptide</b>      | <i>Dipeptide</i>                                            | valylglycine                 | 2 |
| <b>Peptide</b>      | <i>Dipeptide</i>                                            | valylleucine                 | 2 |
| <b>Lipid</b>        | <i>Eicosanoid</i>                                           | 12-HEPE                      | 2 |
| <b>Lipid</b>        | <i>Eicosanoid</i>                                           | 12-HETE                      | 2 |
| <b>Carbohydrate</b> | <i>Glycolysis, Gluconeogenesis, and Pyruvate Metabolism</i> | lactate                      | 2 |
| <b>Amino Acid</b>   | <i>Methionine, Cysteine, SAM and Taurine Metabolism</i>     | S-adenosylhomocysteine (SAH) | 2 |
| <b>Amino Acid</b>   | <i>Methionine, Cysteine, SAM and Taurine Metabolism</i>     | taurine                      | 2 |
| <b>Nucleotide</b>   | <i>Purine Metabolism, (Hypo)Xanthine/Inosine containing</i> | hypoxanthine                 | 2 |
| <b>Nucleotide</b>   | <i>Purine Metabolism, (Hypo)Xanthine/Inosine containing</i> | xanthine                     | 2 |
| <b>Nucleotide</b>   | <i>Purine Metabolism, (Hypo)Xanthine/Inosine containing</i> | xanthosine                   | 2 |
| <b>NA</b>           | NA                                                          | X - 11261                    | 3 |
| <b>NA</b>           | NA                                                          | X - 11478                    | 3 |
| <b>NA</b>           | NA                                                          | X - 11521                    | 3 |
| <b>NA</b>           | NA                                                          | X - 11949                    | 3 |
| <b>NA</b>           | NA                                                          | X - 12742                    | 3 |
| <b>NA</b>           | NA                                                          | X - 12802                    | 3 |
| <b>NA</b>           | NA                                                          | X - 12824                    | 3 |
| <b>NA</b>           | NA                                                          | X - 12855                    | 3 |
| <b>NA</b>           | NA                                                          | X - 12860                    | 3 |
| <b>NA</b>           | NA                                                          | X - 13743                    | 3 |
| <b>NA</b>           | NA                                                          | X - 14939                    | 3 |
| <b>NA</b>           | NA                                                          | X - 15486                    | 3 |
| <b>NA</b>           | NA                                                          | X - 16397                    | 3 |
| <b>NA</b>           | NA                                                          | X - 16570                    | 3 |
| <b>NA</b>           | NA                                                          | X - 16580                    | 3 |
| <b>NA</b>           | NA                                                          | X - 17001                    | 3 |
| <b>NA</b>           | NA                                                          | X - 17138                    | 3 |
| <b>NA</b>           | NA                                                          | X - 18888                    | 3 |
| <b>NA</b>           | NA                                                          | X - 18921                    | 3 |
| <b>Lipid</b>        | <i>Fatty Acid Metabolism(Acyl Carnitine)</i>                | acetylcarnitine              | 3 |
| <b>Lipid</b>        | <i>Fatty Acid Metabolism(Acyl Carnitine)</i>                | hydroxybutyrylcarnitine*     | 3 |
| <b>Lipid</b>        | <i>Fatty Acid, Monohydroxy</i>                              | 3-hydroxyoctanoate           | 3 |
| <b>Lipid</b>        | <i>Ketone Bodies</i>                                        | 3-hydroxybutyrate (BHBA)     | 3 |
| <b>NA</b>           | NA                                                          | X - 15664                    | 4 |
| <b>NA</b>           | NA                                                          | X - 16932                    | 4 |
| <b>NA</b>           | NA                                                          | X - 16938                    | 4 |
| <b>NA</b>           | NA                                                          | X - 17137                    | 4 |
| <b>NA</b>           | NA                                                          | X - 18752                    | 4 |

**Note:**

NA: Not applicable, compound not identified; \* indicates compounds with level 3 identity confidence (lack authenticated standards but had characteristics correlated with known metabolites).
