# Supplementary material
Source: PubMed Central journal article supplement (PMC6791568)
Supplement: ehp-127-057010-s002.pdf [file ehp-127-057010-s002.pdf]

**Note to readers with disabilities:** *EHP* strives to ensure that all journal content is accessible to all readers. However, some figures and Supplemental Material published in *EHP* articles may not conform to [508 standards](#) due to the complexity of the information being presented. If you need assistance accessing journal content, please contact [ehp508@niehs.nih.gov](mailto:ehp508@niehs.nih.gov). Our staff will work with you to assess and meet your accessibility needs within 3 working days.

### **Supplemental Material**

#### **Metabolomics Profiling before, during, and after the Beijing Olympics: A Panel Study of Within-Individual Differences during Periods of High and Low Air Pollution**

Lina Mu, Zhongzheng Niu, Rachael Hageman Blair, Han Yu, Richard W. Browne, Matthew R. Bonner, Tiffany Fanter, Furong Deng, and Mya Swanson

#### **Table of Contents**

**Table S1.** Subclasses of 74 out of 886 metabolites that were different before, during, and after 2008 Beijing Olympics in 26 non-smoking adults.

**Table S2.** ANOVA test of modules for times before, during, and after the Olympics, sex, and interaction in 26 non-smoking adults.

**Table S3.** Metabolites and associated classes detected from module 1-4 with significant differences (adjusted  $P < 0.05$ ) before, during and after the Beijing 2008 Olympics in 26 non-smoking adults.
